# Supplementary material
Source: PubMed Central journal article supplement (PMC8900891)
Supplement: ana-34-209-s001.pdf [file ana-34-209-s001.pdf]

Supplementary Digital Content 1  
Survey Questionnaire

| Variable / Field Name | Field Type | Field Label                                              | Choices, Calculations, OR Slider Labels                                                                                                                                                                                                                                                                                                                                                                                                                                                                                                                                                                                                                                                                                                                                                                                                                                                                                                                                                                                                                                                                                                                                                                                                                                                                                                                                                                                                                                                                                                                                                                                                                                                                                                                                                                                                                                                                                                                                                                                                                                                                                                                                                                                 | Field Note | Text Validation Type OR Show Slider Number | Text Validation Min | Text Validation Max | Identifier? | Branching Logic (Show field only if...) | Required Field? | Custom Alignment | Question Number (surveys only) | Matrix Group Name |  |
|-----------------------|------------|----------------------------------------------------------|-------------------------------------------------------------------------------------------------------------------------------------------------------------------------------------------------------------------------------------------------------------------------------------------------------------------------------------------------------------------------------------------------------------------------------------------------------------------------------------------------------------------------------------------------------------------------------------------------------------------------------------------------------------------------------------------------------------------------------------------------------------------------------------------------------------------------------------------------------------------------------------------------------------------------------------------------------------------------------------------------------------------------------------------------------------------------------------------------------------------------------------------------------------------------------------------------------------------------------------------------------------------------------------------------------------------------------------------------------------------------------------------------------------------------------------------------------------------------------------------------------------------------------------------------------------------------------------------------------------------------------------------------------------------------------------------------------------------------------------------------------------------------------------------------------------------------------------------------------------------------------------------------------------------------------------------------------------------------------------------------------------------------------------------------------------------------------------------------------------------------------------------------------------------------------------------------------------------------|------------|--------------------------------------------|---------------------|---------------------|-------------|-----------------------------------------|-----------------|------------------|--------------------------------|-------------------|--|
| country_name          | dropdown   | Please indicate the location of your hospital by country | 1, Afghanistan   2, Albania   3, Algeria   4, Andorra   5, Angola   6, Antigua and Barbuda   7, Argentina   8, Armenia   9, Australia   10, Austria   11, Azerbaijan   12, Bahamas   13, Bahrain   14, Bangladesh   15, Barbados   16, Belarus   17, Belgium   18, Belize   19, Benin   20, Bhutan   21, Bolivia   22, Bosnia and Herzegovina   23, Botswana   24, Brazil   25, Brunei   26, Bulgaria   27, Burkina Faso   28, Burundi   29, Cabo Verde   30, Cambodia   31, Cameroon   32, Canada   33, Central African Republic (CAR)   34, Chad   35, Chile   36, China   37, Colombia   38, Comoros   197, Congo   39, Costa Rica   40, Cote d'Ivoire   41, Croatia   42, Cuba   43, Cyprus   44, Czechia   45, Denmark   46, Djibouti   47, Dominica   48, Dominican Republic   49, Ecuador   50, Egypt   51, El Salvador   52, Equatorial Guinea   53, Eritrea   54, Estonia   55, Eswatini (formerly Swaziland)   56, Ethiopia   57, Fiji   58, Finland   59, France   61, Gabon   62, Gambia   63, Georgia   64, Germany   65, Ghana   66, Greece   67, Grenada   68, Guatemala   69, Guinea   70, Guinea-Bissau   71, Guyana   72, Haiti   73, Honduras   74, Hungary   75, Iceland   76, India   77, Indonesia   78, Iran   79, Iraq   80, Ireland   81, Israel   82, Italy   83, Jamaica   84, Japan   85, Jordan   86, Kazakhstan   87, Kenya   88, Kiribati   89, Kosovo   90, Kuwait   91, Kyrgyzstan   92, Laos   93, Latvia   94, Lebanon   95, Lesotho   96, Liberia   97, Libya   98, Liechtenstein   99, Lithuania   100, Luxembourg   101, Madagascar   102, Malawi   103, Malaysia   104, Maldives   105, Mali   106, Malta   107, Marshall Islands   108, Mauritania   109, Mauritius   110, Mexico   111, Micronesia   112, Moldova   113, Monaco   114, Mongolia   115, Montenegro   116, Morocco   117, Mozambique   118, Myanmar (formerly Burma)   119, Namibia   120, Nauru   121, Nepal   122, Netherlands   123, New Zealand   124, Nicaragua   125, Niger   126, Nigeria   127, North Korea   128, North Macedonia (formerly Macedonia)   129, Norway   130, Oman   131, Pakistan   132, Palau   133, Palestine   134, Panama   135, Papua New Guinea   136, Paraguay   137, Peru   138, |            |                                            |                     |                     |             |                                         | y               |                  |                                |                   |  |

|                            |          |                                                                                                                                                                                                                                                                                                                                           |                                                                                                                                                                                                                                                                                                                                                                                                                                                                                                                                                                                                                                                                                                                                                                                                                                                                                                                                                                                                                                                                                                        |                        |   |  |  |   |  |  |
|----------------------------|----------|-------------------------------------------------------------------------------------------------------------------------------------------------------------------------------------------------------------------------------------------------------------------------------------------------------------------------------------------|--------------------------------------------------------------------------------------------------------------------------------------------------------------------------------------------------------------------------------------------------------------------------------------------------------------------------------------------------------------------------------------------------------------------------------------------------------------------------------------------------------------------------------------------------------------------------------------------------------------------------------------------------------------------------------------------------------------------------------------------------------------------------------------------------------------------------------------------------------------------------------------------------------------------------------------------------------------------------------------------------------------------------------------------------------------------------------------------------------|------------------------|---|--|--|---|--|--|
|                            |          |                                                                                                                                                                                                                                                                                                                                           | Philippines   139, Poland   140, Portugal   141, Qatar   142, Romania   143, Russia   144, Rwanda   145, Saint Kitts and Nevis   146, Saint Lucia   147, Saint Vincent and the Grenadines   148, Samoa   149, San Marino   150, Sao Tome and Principe   151, Saudi Arabia   152, Senegal   153, Serbia   154, Seychelles   155, Sierra Leone   156, Singapore   157, Slovakia   158, Slovenia   159, Solomon Islands   160, Somalia   161, South Africa   162, South Korea   163, South Sudan   164, Spain   165, Sri Lanka   166, Sudan   167, Suriname   168, Sweden   169, Switzerland   170, Syria   171, Taiwan   172, Tajikistan   173, Tanzania   174, Thailand   175, Timor-Leste   176, Togo   177, Tonga   178, Trinidad and Tobago   179, Tunisia   180, Turkey   181, Turkmenistan   182, Tuvalu   183, Uganda   184, Ukraine   185, United Arab Emirates (UAE)   186, United Kingdom (UK)   187, United States of America (USA)   188, Uruguay   189, Uzbekistan   190, Vanuatu   191, Vatican City (Holy See)   192, Venezuela   193, Vietnam   194, Yemen   195, Zambia   196, Zimbabwe |                        |   |  |  |   |  |  |
| please_provide_the_zip_cod | text     | Please provide the zip code (postal code) for your hospital. (Please note that the zip code/postal code will not be used to identify your hospital. Instead, it will be used to cluster responses to a geographical location, by the number of patients with COVID-19 disease based on data from the John Hopkins COVID reporting center) |                                                                                                                                                                                                                                                                                                                                                                                                                                                                                                                                                                                                                                                                                                                                                                                                                                                                                                                                                                                                                                                                                                        |                        |   |  |  | y |  |  |
| us_state                   | dropdown | Please indicate the location of your hospital in the U.S. (Please note that this information will not be used to identify your hospital. Instead, it will be used to                                                                                                                                                                      | 1, Alabama   2, Alaska   3, Arizona   4, Arkansas   5, California   6, Colorado   7, Connecticut   8, Delaware   9, Florida   10, Georgia   11, Hawaii   12, Idaho   13, Illinois   14, Indiana   15, Iowa   16, Kansas   17, Kentucky   18, Louisiana   19, Maine   20, Maryland   21, Massachusetts   22, Michigan   23, Minnesota   24, Mississippi   25, Missouri   26, Montana   27, Nebraska   28, Nevada   29, New Hampshire   30, New Jersey   31, New Mexico   32, New York   33, North Carolina   34, North Dakota   35, Ohio   36, Oklahoma   37, Oregon   38, Pennsylvania   39, Rhode Island   40, South Carolina   41, South Dakota   42, Tennessee   43, Texas   44, Utah   45, Vermont                                                                                                                                                                                                                                                                                                                                                                                                 | [country_name] = '187' | y |  |  |   |  |  |

|                               |          |                                                                                                                                             |                                                                                                                                                                                                                                                                                                                                                                                                                                                                                                                                                                                                                                                                                                                                                                                                              |  |  |  |  |  |                             |   |  |  |  |
|-------------------------------|----------|---------------------------------------------------------------------------------------------------------------------------------------------|--------------------------------------------------------------------------------------------------------------------------------------------------------------------------------------------------------------------------------------------------------------------------------------------------------------------------------------------------------------------------------------------------------------------------------------------------------------------------------------------------------------------------------------------------------------------------------------------------------------------------------------------------------------------------------------------------------------------------------------------------------------------------------------------------------------|--|--|--|--|--|-----------------------------|---|--|--|--|
|                               |          | cluster responses by geographical location)                                                                                                 | 46, Virginia   47, Washington   48, West Virginia   49, Wisconsin   50, Wyoming                                                                                                                                                                                                                                                                                                                                                                                                                                                                                                                                                                                                                                                                                                                              |  |  |  |  |  |                             |   |  |  |  |
| please_provide_the_bed_cap    | radio    | Please provide the total number of licensed beds in your hospital.                                                                          | 1, 1-200   2, 201-400   3, 401-600   4, >600                                                                                                                                                                                                                                                                                                                                                                                                                                                                                                                                                                                                                                                                                                                                                                 |  |  |  |  |  |                             | y |  |  |  |
| please_provide_the_total_n    | radio    | Please provide the total number of licensed intensive care unit beds at your hospital                                                       | 1, 1-50   2, 51-100   3, 101-150   4, >150                                                                                                                                                                                                                                                                                                                                                                                                                                                                                                                                                                                                                                                                                                                                                                   |  |  |  |  |  |                             | y |  |  |  |
| institution_type              | checkbox | Please choose from the following options what best describes your institution                                                               | 1, Academic   2, Private non-academic   3, Public non-academic   4, Other                                                                                                                                                                                                                                                                                                                                                                                                                                                                                                                                                                                                                                                                                                                                    |  |  |  |  |  |                             | y |  |  |  |
| you_selected_the_other_option | text     | You selected the "other" option. Please elaborate.                                                                                          |                                                                                                                                                                                                                                                                                                                                                                                                                                                                                                                                                                                                                                                                                                                                                                                                              |  |  |  |  |  | [institution_type(4)] = '1' | y |  |  |  |
| please_describe_the_charac    | checkbox | Please describe the characteristics of your institution as it pertained to caring for the neurologically ill patients prior to the COVID-19 | 1, Level I NCCU (advanced monitoring, surgical and medical treatments, the capability to provide physician fellowship and advanced practice professional training)   2, Level II NCCU (stabilize acutely ill patients and safely manage stable neurocritical disease processes, while having established relationships with Level I NCCUs)   3, Level III NCCU (emergent evaluation and stabilization of patients presenting with neurological emergencies and facilitate the transfer of these patients to Level I and Level II NCCUs)   4, Comprehensive stroke center   5, Primary stroke center   6, Thrombectomy capable stroke center   7, Non-stroke center   8, Level I trauma center   9, Level II trauma center   10, Level III trauma center   11, Level IV trauma center   12, Non-trauma center |  |  |  |  |  |                             | y |  |  |  |

|                                |              |                                                                                                                                                                                 |                                                                                                                                                           |  |  |  |  |  |                                  |   |  |  |  |
|--------------------------------|--------------|---------------------------------------------------------------------------------------------------------------------------------------------------------------------------------|-----------------------------------------------------------------------------------------------------------------------------------------------------------|--|--|--|--|--|----------------------------------|---|--|--|--|
|                                |              | pandemic<br>(check all that<br>may apply)                                                                                                                                       |                                                                                                                                                           |  |  |  |  |  |                                  |   |  |  |  |
| nccu_organization              | check<br>box | Please<br>describe the<br>organizational<br>structure of<br>your<br>neurocritical<br>care unit<br>(NCCU) prior<br>to the COVID-<br>19 pandemic<br>(check all that<br>may apply) | 1,<br>Geograph<br>ically<br>dedicated<br>NCCU   2,<br>Non-<br>geographi<br>cally<br>dedicated<br>/mixed<br>medical/s<br>urgical<br>intensive<br>care unit |  |  |  |  |  |                                  | y |  |  |  |
| what_is_the_bed_<br>capacity_o | radio        | What is the<br>licensed bed<br>capacity of<br>your NCCU?                                                                                                                        | 1, 1-10<br>beds   2,<br>11-20<br>beds   3,<br>21-30<br>beds   4,<br>31 or<br>more<br>beds                                                                 |  |  |  |  |  | [nccu_organization(<br>1)] = '1' | y |  |  |  |
| mixed_icu_beds                 | radio        | What is the<br>licensed bed<br>capacity of<br>your mixed<br>intensive care<br>unit?                                                                                             | 1, 1-10<br>beds   2,<br>11-20<br>beds   3,<br>21-30<br>beds   4,<br>31 or<br>more<br>beds                                                                 |  |  |  |  |  | [nccu_organization(<br>2)] = '1' | y |  |  |  |
| co_management_<br>model        | check<br>box | Co-<br>management<br>model                                                                                                                                                      | 1, Closed<br>NCCU   2,<br>Semi-<br>open/Se<br>mi-closed<br>NCCU   3,                                                                                      |  |  |  |  |  | [nccu_organization(<br>1)] = '1' |   |  |  |  |

|                            |          |                                                                                                                     |                                                                                                                                                                                                                                                                                                                                                                                                                                                                                                                                                                                                                                                                                   |  |  |  |  |  |                              |   |  |  |  |
|----------------------------|----------|---------------------------------------------------------------------------------------------------------------------|-----------------------------------------------------------------------------------------------------------------------------------------------------------------------------------------------------------------------------------------------------------------------------------------------------------------------------------------------------------------------------------------------------------------------------------------------------------------------------------------------------------------------------------------------------------------------------------------------------------------------------------------------------------------------------------|--|--|--|--|--|------------------------------|---|--|--|--|
|                            |          |                                                                                                                     | Open NCCU                                                                                                                                                                                                                                                                                                                                                                                                                                                                                                                                                                                                                                                                         |  |  |  |  |  |                              |   |  |  |  |
| co_mgt_model               | radio    | Co-management model                                                                                                 | 1, Open intensive care unit   2, Semi-open/se mi-closed intensive care unit   3, Closed intensive care unit                                                                                                                                                                                                                                                                                                                                                                                                                                                                                                                                                                       |  |  |  |  |  | [nccu_organization(2)] = '1' | y |  |  |  |
| please_describe_informatio | checkbox | Please describe the type of intensivists that attend to the neurocritically ill patients (check all that may apply) | 1, Neurointensivists with neurology training   2, Neurointensivists with pulmonary critical care /medicine critical care training   3, Neurointensivists with anesthesia critical care training   4, Neurointensivists with an emergency medicine training   5, Neurointensivists with a pediatric critical care training   9, Neurointensivists with a general surgery/neurosurgery training   6, General intensivists with pulmonary critical care /medicine critical care training   7, General intensivists with anesthesia critical care training   8, General intensivists with emergency medicine training   10, General intensivists with surgical critical care training |  |  |  |  |  |                              | y |  |  |  |
| advanced_practice_provider | yesno    | Are advanced practice providers/physician assistants members of your neurocritical care team?                       |                                                                                                                                                                                                                                                                                                                                                                                                                                                                                                                                                                                                                                                                                   |  |  |  |  |  |                              | y |  |  |  |
| do_you_currently_have_a_de | yesno    | Do you currently have a dedicated neurocritical care/general critical care pharmacist?                              |                                                                                                                                                                                                                                                                                                                                                                                                                                                                                                                                                                                                                                                                                   |  |  |  |  |  |                              | y |  |  |  |
| do_you_have_a_neurocritica | checkbox | Please choose from the                                                                                              | 1, Neurocriti                                                                                                                                                                                                                                                                                                                                                                                                                                                                                                                                                                                                                                                                     |  |  |  |  |  |                              | y |  |  |  |

|                            |          |                                                                                                                                      |                                                                                                                                                  |  |  |  |  |  |                                        |   |  |  |  |
|----------------------------|----------|--------------------------------------------------------------------------------------------------------------------------------------|--------------------------------------------------------------------------------------------------------------------------------------------------|--|--|--|--|--|----------------------------------------|---|--|--|--|
|                            |          | following options the type of critical care or neurocritical care fellowships offered at your institution (Check all that may apply) | cal care fellowship   2, Non-neurocritical care fellowships   3, None                                                                            |  |  |  |  |  |                                        |   |  |  |  |
| please_describe_resident_t | checkbox | Please describe resident trainees that rotate in your NCCU (check all that may apply)                                                | 1, Anesthesia   2, Neurology   3, Neurosurgery   4, Internal medicine   5, Emergency medicine   6, Pediatrics   8, Surgery   9, None   10, Other |  |  |  |  |  |                                        | y |  |  |  |
| you_checked_the_other_opti | text     | You checked the other option. Please elaborate.                                                                                      |                                                                                                                                                  |  |  |  |  |  | [please_describe_resident_t(10)] = '1' | y |  |  |  |
| please_describe_fellow_lev | checkbox | Please describe fellow-level trainees that rotate in your NCCU (check                                                                | 1, Anesthesia   2, Neurology   3, Neurosurgery   4,                                                                                              |  |  |  |  |  |                                        | y |  |  |  |

|                            |          |                                                                                                                                                  |                                                                                                                                                                                                                                                                                                                                                                                                                                                                                                                              |  |  |  |  |  |                                                 |   |  |  |  |
|----------------------------|----------|--------------------------------------------------------------------------------------------------------------------------------------------------|------------------------------------------------------------------------------------------------------------------------------------------------------------------------------------------------------------------------------------------------------------------------------------------------------------------------------------------------------------------------------------------------------------------------------------------------------------------------------------------------------------------------------|--|--|--|--|--|-------------------------------------------------|---|--|--|--|
|                            |          | all that may apply)                                                                                                                              | Pulmonary critical care   5, Anesthesia critical care   6, Pediatric critical care   7, Surgical critical care   8, Emergency medicine critical care   9, None   10, Other                                                                                                                                                                                                                                                                                                                                                   |  |  |  |  |  |                                                 |   |  |  |  |
| you_checked_the_other_opti | text     | You checked the other option. Please elaborate                                                                                                   |                                                                                                                                                                                                                                                                                                                                                                                                                                                                                                                              |  |  |  |  |  | [please_describe_following_low_level(10)] = '1' | y |  |  |  |
| describe_the_time_period_a | checkbox | From the following options, please chose the time period when your hospital experienced a surge in the COVID-19 cases (check all that may apply) | 14, End of December to Mid January   15, Mid-January to end of January   16, End of January to mid-February   17, Mid to end of February   2, End of February to Mid March   3, Mid to the end of March   4, End of March to mid-April   5, Mid to the end of April   6, End April to Mid May   7, Mid to the end of May   8, End of May to Mid June   9, Mid to end of June   10, End of June to Mid July   18, Mid to end of July   19, End July to Mid August   12, Did not experience a surge yet   13, Surge is ongoing |  |  |  |  |  |                                                 | y |  |  |  |
| ncc_attending_physicians   | yesno    | Were any members of your critical care team unavailable as they were                                                                             |                                                                                                                                                                                                                                                                                                                                                                                                                                                                                                                              |  |  |  |  |  |                                                 | y |  |  |  |

|                             |       |                                                                                                      |                                                                                                                                                |  |  |  |  |  |   |  |  |  |                |
|-----------------------------|-------|------------------------------------------------------------------------------------------------------|------------------------------------------------------------------------------------------------------------------------------------------------|--|--|--|--|--|---|--|--|--|----------------|
|                             |       | tested due to COVID or COVID-like symptoms or were quarantined?                                      |                                                                                                                                                |  |  |  |  |  |   |  |  |  |                |
| how_many_neuro_critical_car | radio | Please provide an estimate of the proportion of your critical care team workforce that were affected | 6, 1-5%   7, 6-10%   8, 11-20%   9, >20%   10, I don't know the exact number, but aware that some proportion was affected   11, Not applicable |  |  |  |  |  |   |  |  |  |                |
| unit_structure              | radio | NCCU /CCU location (Contingency plans for surge capacity)                                            | 1, Adequate time available to plan ahead   2, Some time (though inadequate) to plan ahead   3, Surge hit us before any planning could be       |  |  |  |  |  | y |  |  |  | surge_planning |



|                           |       |                                                           |                                                                                                                                                     |  |  |  |  |  |  |   |  |  |                |
|---------------------------|-------|-----------------------------------------------------------|-----------------------------------------------------------------------------------------------------------------------------------------------------|--|--|--|--|--|--|---|--|--|----------------|
|                           |       |                                                           | thought of                                                                                                                                          |  |  |  |  |  |  |   |  |  |                |
| nccu_staffing_contingency | radio | NCCU /CCU staffing (Contingency plans for surge capacity) | 1, Adequate time available to plan ahead   2, Some time (though Inadequate) to plan ahead   3, Surge hit us before any planning could be thought of |  |  |  |  |  |  | y |  |  | surge_planning |
| nccu_workflow_contingency | radio | NCCU /CCU workflow (Contingency plans for surge capacity) | 1, Adequate time available to plan ahead   2, Some time (though Inadequate) to plan ahead   3, Surge hit us before any planning could be            |  |  |  |  |  |  | y |  |  | surge_planning |

|            |       |                                                                                                                                |                                                                                    |  |  |  |  |  |  |   |  |              |
|------------|-------|--------------------------------------------------------------------------------------------------------------------------------|------------------------------------------------------------------------------------|--|--|--|--|--|--|---|--|--------------|
|            |       |                                                                                                                                | thought of                                                                         |  |  |  |  |  |  |   |  |              |
| physicians | radio | The total number of NCC/CC physicians available to staff your neurocritical care service                                       | 1, No change   2, Reduced   3, Increased   4, Does not apply to my hospital set up |  |  |  |  |  |  | y |  | ncc_staffing |
| app_pa     | radio | The total number of NCC/CC advanced practice providers/physician assistants available to staff your neurocritical care service | 1, No change   2, Reduced   3, Increased   4, Does not apply to my hospital set up |  |  |  |  |  |  | y |  | ncc_staffing |
| resident   | radio | The total number of resident trainees rotating on your neurocritical care service                                              | 1, No change   2, Reduced   3, Increased   4, Does not apply to my hospital set up |  |  |  |  |  |  | y |  | ncc_staffing |
| ncc_fellow | radio | The total number of NCC/CC fellows available                                                                                   | 1, No change   2, Reduced   3, Increased                                           |  |  |  |  |  |  | y |  | ncc_staffing |

|                            |       |                                                                                                |                                                                                    |  |  |  |  |  |   |  |  |                |
|----------------------------|-------|------------------------------------------------------------------------------------------------|------------------------------------------------------------------------------------|--|--|--|--|--|---|--|--|----------------|
|                            |       |                                                                                                | 4, Does not apply to my hospital set up                                            |  |  |  |  |  |   |  |  |                |
| non_ncc_fellow             | radio | The total number of rotating CC fellows from non-neurocritical care fellowship programs        | 1, No change   2, Reduced   3, Increased   4, Does not apply to my hospital set up |  |  |  |  |  | y |  |  | ncc_staffing   |
| nurses                     | radio | The total number of NCC/CC care nurses available to attend to the neurocritically ill patients | 1, No change   2, Reduced   3, Increased   4, Does not apply to my hospital set up |  |  |  |  |  | y |  |  | ncc_staffing   |
| the_total_number_of_ncc_cc | radio | The total number of NCC/CC pharmacist(s)                                                       | 1, No change   2, Reduced   3, Increased   4, Does not apply to my hospital set up |  |  |  |  |  | y |  |  | ncc_staffing   |
| staffing                   | radio | NCCU/CCU remained in its usual location with                                                   | 1, Yes   2, No                                                                     |  |  |  |  |  | y |  |  | nccu_structure |

|                   |       |                                                                                                                                    |                |  |  |  |  |  |  |   |  |  |                |
|-------------------|-------|------------------------------------------------------------------------------------------------------------------------------------|----------------|--|--|--|--|--|--|---|--|--|----------------|
|                   |       | standard staffing                                                                                                                  |                |  |  |  |  |  |  |   |  |  |                |
| covid_cohort      | radio | NCCU /CCU was partly or completely converted to a COVID-cohorting unit                                                             | 1, Yes   2, No |  |  |  |  |  |  | y |  |  | nccu_structure |
| nonnccu_nccu      | radio | All neurocritical care patients were admitted to a non-neurocritical care unit and managed by neurocritical care clinicians        | 1, Yes   2, No |  |  |  |  |  |  | y |  |  | nccu_structure |
| non_nccu_non_nccu | radio | All neurocritical care patients were admitted to a non-neurocritical care service and managed by non-neurocritical care clinicians | 1, Yes   2, No |  |  |  |  |  |  | y |  |  | nccu_structure |
| some_nccu         | radio | Some patients were admitted to a non-neurocritical care unit but were still managed by neurocritical care clinicians               | 1, Yes   2, No |  |  |  |  |  |  | y |  |  | nccu_structure |
| some_nonnccu      | radio | Some patients were admitted to a non-neurocritical                                                                                 | 1, Yes   2, No |  |  |  |  |  |  | y |  |  | nccu_structure |

|                            |       |                                                                         |                                                                      |  |  |  |  |  |  |   |  |  |                |
|----------------------------|-------|-------------------------------------------------------------------------|----------------------------------------------------------------------|--|--|--|--|--|--|---|--|--|----------------|
|                            |       | care unit and managed by non-neurocritical care clinicians              |                                                                      |  |  |  |  |  |  |   |  |  |                |
| regular_floor_beds_were_co | radio | Regular floor beds were converted into ICU beds                         | 1, Yes   2, No                                                       |  |  |  |  |  |  | y |  |  | nccu_structure |
| emergency_room_beds_were_c | radio | Emergency room beds were converted into ICU beds                        | 1, Yes   2, No                                                       |  |  |  |  |  |  | y |  |  | nccu_structure |
| operating_rooms_were_conve | radio | Operating rooms were converted into ICU beds                            | 1, Yes   2, No                                                       |  |  |  |  |  |  | y |  |  | nccu_structure |
| post_anesthesia_care_unit  | radio | Post-anesthesia care unit (PACU) beds were converted into ICU beds      | 1, Yes   2, No                                                       |  |  |  |  |  |  | y |  |  | nccu_structure |
| overall_admission_to_neuro | radio | Number of admissions to neurocritical unit / general critical care unit | 1, No change in the number   2, Reduced number   3, Increased number |  |  |  |  |  |  | y |  |  | admissions     |
| patients_with_acute_ischem | radio | Patients with acute ischemic stroke                                     | 1, No change in the number   2, Reduced number                       |  |  |  |  |  |  | y |  |  | admissions     |

|                                |       |                                                                      |                                                                                                 |  |  |  |  |  |   |  |  |            |
|--------------------------------|-------|----------------------------------------------------------------------|-------------------------------------------------------------------------------------------------|--|--|--|--|--|---|--|--|------------|
|                                |       |                                                                      | 3,<br>Increased<br>number                                                                       |  |  |  |  |  |   |  |  |            |
| patients_with_non<br>_traumati | radio | Patients with<br>non-traumatic<br>intraparenchy<br>mal<br>hemorrhage | 1, No<br>change in<br>the<br>number  <br>2,<br>Reduced<br>number  <br>3,<br>Increased<br>number |  |  |  |  |  | y |  |  | admissions |
| patients_with_ane<br>urysmal_s | radio | Patients with<br>aneurysmal<br>subarachnoid<br>hemorrhage            | 1, No<br>change in<br>the<br>number  <br>2,<br>Reduced<br>number  <br>3,<br>Increased<br>number |  |  |  |  |  | y |  |  | admissions |
| patients_with_trau<br>matic_br | radio | Patients with<br>traumatic<br>brain injury                           | 1, No<br>change in<br>the<br>number  <br>2,<br>Reduced<br>number  <br>3,<br>Increased<br>number |  |  |  |  |  | y |  |  | admissions |
| patients_with_trau<br>matic_sp | radio | Patients with<br>traumatic<br>spinal cord<br>injury                  | 1, No<br>change in<br>the<br>number  <br>2,<br>Reduced<br>number  <br>3,                        |  |  |  |  |  | y |  |  | admissions |

|                             |       |                                                       |                                                                      |  |  |  |  |  |  |   |  |  |            |
|-----------------------------|-------|-------------------------------------------------------|----------------------------------------------------------------------|--|--|--|--|--|--|---|--|--|------------|
|                             |       |                                                       | Increased number                                                     |  |  |  |  |  |  |   |  |  |            |
| central_nervous_system_inf  | radio | Central nervous system infections                     | 1, No change in the number   2, Reduced number   3, Increased number |  |  |  |  |  |  | y |  |  | admissions |
| status_epilepticus          | radio | Status epilepticus                                    | 1, No change in the number   2, Reduced number   3, Increased number |  |  |  |  |  |  | y |  |  | admissions |
| neuromuscular_weakness_gbs  | radio | Neuromuscular weakness (GBS, Myasthenia, and others)  | 1, No change in the number   2, Reduced number   3, Increased number |  |  |  |  |  |  | y |  |  | admissions |
| post_cardiac_arrest_hypoxia | radio | Post-cardiac arrest (hypoxic-ischemic encephalopathy) | 1, No change in the number   2, Reduced number   3, Increased number |  |  |  |  |  |  | y |  |  | admissions |

|                                                                            |       |                                                                        |                                                                      |  |  |  |  |  |  |   |  |  |            |
|----------------------------------------------------------------------------|-------|------------------------------------------------------------------------|----------------------------------------------------------------------|--|--|--|--|--|--|---|--|--|------------|
| acute_symptomatic_hydrocephalus                                            | radio | Acute symptomatic hydrocephalus from CSF shunt malfunction/infections  | 1, No change in the number   2, Reduced number   3, Increased number |  |  |  |  |  |  | y |  |  | admissions |
| patients_s_p_surgery_for_intracranial_tumor                                | radio | Elective surgery for intracranial tumor                                | 1, No change in the number   2, Reduced number   3, Increased number |  |  |  |  |  |  | y |  |  | admissions |
| patients_s_p_surgery_for_unruptured_intracerebral_aneurysm                 | radio | Elective surgery for repair of unruptured intracerebral aneurysm       | 1, No change in the number   2, Reduced number   3, Increased number |  |  |  |  |  |  | y |  |  | admissions |
| patients_s_p_endovascular_repair_of_unruptured_arteriovenous_malformations | radio | Elective endovascular repair of unruptured arteriovenous malformations | 1, No change in the number   2, Reduced number   3, Increased number |  |  |  |  |  |  | y |  |  | admissions |



|                            |          |                                                                                            |                                                                      |  |  |  |  |  |                                    |   |  |  |                                 |
|----------------------------|----------|--------------------------------------------------------------------------------------------|----------------------------------------------------------------------|--|--|--|--|--|------------------------------------|---|--|--|---------------------------------|
| other_neurourgical_and_non | radio    | Other elective neurosurgical cases                                                         | 1, No change in the number   2, Reduced number   3, Increased number |  |  |  |  |  |                                    | y |  |  | admissions                      |
| other_elective_non_neurosu | radio    | Other elective non-neurosurgical cases                                                     | 1, No change in the number   2, Reduced number   3, Increased number |  |  |  |  |  |                                    | y |  |  | admissions                      |
| was_any_virtual_neurocriti | yesno    | Was any telemedicine service provided to neurocritically ill patients during the pandemic? |                                                                      |  |  |  |  |  |                                    | y |  |  |                                 |
| the_telemedicine_provided  | checkbox | This telemedicine service was provided. (check all that may apply)                         | 1, Remotely   2, Locally   3, Both                                   |  |  |  |  |  | [was_any_virtual_neurocriti] = '1' | y |  |  |                                 |
| daily_lectures             | radio    | Daily lectures                                                                             | 1, In-person meeting only   2, Activity was canceled   3,            |  |  |  |  |  |                                    | y |  |  | academic_administrative_mission |

|              |       |              |                                                                                                                                                |  |  |  |  |  |   |  |  |                                 |
|--------------|-------|--------------|------------------------------------------------------------------------------------------------------------------------------------------------|--|--|--|--|--|---|--|--|---------------------------------|
|              |       |              | Virtual medium only   4, In-person meeting plus option to attend in a virtual medium                                                           |  |  |  |  |  |   |  |  |                                 |
| journal_club | radio | Journal Club | 1, In-person meeting only   2, Activity was canceled   3, Virtual medium only   4, In-person meeting plus option to attend in a virtual medium |  |  |  |  |  | y |  |  | academic_administrative_mission |
| gc           | radio | Grand rounds | 1, In-person meeting only   2, Activity was canceled   3, Virtual medium only   4, In-person meeting plus                                      |  |  |  |  |  | y |  |  | academic_administrative_mission |



|                            |       |                                                         |                                                                                                                                                                |  |  |  |  |  |   |  |  |                    |
|----------------------------|-------|---------------------------------------------------------|----------------------------------------------------------------------------------------------------------------------------------------------------------------|--|--|--|--|--|---|--|--|--------------------|
|                            |       |                                                         | <p>compared to pre-pandemic numbrs   2, Increased participat ion   3, Reduced participat ion   4, Meetings were canceled, thus does not apply</p>              |  |  |  |  |  |   |  |  |                    |
| faculty_and_staff_meetings | radio | Faculty and staff meetings                              | <p>1, No change compared to pre-pandemic numbrs   2, Increased participat ion   3, Reduced participat ion   4, Meetings were canceled, thus does not apply</p> |  |  |  |  |  | y |  |  | attendance_virtual |
| qi                         | radio | Quality improvement or mortality and morbidity meetings | <p>1, No change compared to pre-pandemic numbrs   2, Increased</p>                                                                                             |  |  |  |  |  | y |  |  | attendance_virtual |

|              |       |              |                                                                                                                                                                   |  |  |  |  |  |   |  |  |                    |
|--------------|-------|--------------|-------------------------------------------------------------------------------------------------------------------------------------------------------------------|--|--|--|--|--|---|--|--|--------------------|
|              |       |              | participation   3,<br>Reduced participation   4,<br>Meetings were canceled,<br>thus does not apply                                                                |  |  |  |  |  |   |  |  |                    |
| jc           | radio | Journal club | 1, No change compared to pre-pandemic numbrs   2,<br>Increased participation   3,<br>Reduced participation   4,<br>Meetings were canceled,<br>thus does not apply |  |  |  |  |  | y |  |  | attendance_virtual |
| grand_rounds | radio | Grand rounds | 1, No change compared to pre-pandemic numbrs   2,<br>Increased participation   3,<br>Reduced participation   4,<br>Meetings                                       |  |  |  |  |  | y |  |  | attendance_virtual |

|                            |       |                                                                     |                                                                                                     |  |  |  |  |  |   |  |  |            |
|----------------------------|-------|---------------------------------------------------------------------|-----------------------------------------------------------------------------------------------------|--|--|--|--|--|---|--|--|------------|
|                            |       |                                                                     | were canceled, thus does not apply                                                                  |  |  |  |  |  |   |  |  |            |
| neurology_neurointensivist | radio | Neurology neurointensivists deployed to a COVID unit                | 1, All providers<br>  2, Some providers<br>  3, No providers<br>  4, Not applicable to our hospital |  |  |  |  |  | y |  |  | deployment |
| pulmonary_critical_care_de | radio | Pulmonary critical care neurointensivists deployed to a COVID unit  | 1, All providers<br>  2, Some providers<br>  3, No providers<br>  4, Not applicable to our hospital |  |  |  |  |  | y |  |  | deployment |
| anesthesia_critical_care_d | radio | Anesthesia critical care neurointensivists deployed to a COVID unit | 1, All providers<br>  2, Some providers<br>  3, No providers<br>  4, Not applicable to our hospital |  |  |  |  |  | y |  |  | deployment |
| all_neurointensivists_were | radio | Emergency medicine neurointensivists were deployed to a COVID unit  | 1, All providers<br>  2, Some providers<br>  3, No providers<br>  4, Not applicable                 |  |  |  |  |  | y |  |  | deployment |

|                            |       |                                                                              |                                                                                            |  |  |  |  |  |  |   |  |  |            |
|----------------------------|-------|------------------------------------------------------------------------------|--------------------------------------------------------------------------------------------|--|--|--|--|--|--|---|--|--|------------|
|                            |       |                                                                              | e to our hospital                                                                          |  |  |  |  |  |  |   |  |  |            |
| all_neurocritical_care_adv | radio | Neurocritical care advanced practice providers were deployed to a COVID unit | 1, All providers   2, Some providers   3, No providers   4, Not applicable to our hospital |  |  |  |  |  |  | y |  |  | deployment |
| all_neurocritical_care_fel | radio | Neurocritical care fellows were deployed in a COVID unit                     | 1, All providers   2, Some providers   3, No providers   4, Not applicable to our hospital |  |  |  |  |  |  | y |  |  | deployment |
| all_neurocritical_care_nur | radio | Neurocritical care nurses were deployed to a COVID unit                      | 1, All providers   2, Some providers   3, No providers   4, Not applicable to our hospital |  |  |  |  |  |  | y |  |  | deployment |
| clinical_pharmacists       | radio | Clinical pharmacists were deployed to a COVID unit                           | 1, All providers   2, Some providers   3, No providers   4, Not applicable to our hospital |  |  |  |  |  |  | y |  |  | deployment |

|                            |       |                                                                                   |                                                                                                     |  |  |  |  |  |  |   |  |  |            |
|----------------------------|-------|-----------------------------------------------------------------------------------|-----------------------------------------------------------------------------------------------------|--|--|--|--|--|--|---|--|--|------------|
| ret_phy_covid              | radio | Retired physicians were reactivated and integrated in the COVID unit              | 1, All providers<br>  2, Some providers<br>  3, No providers<br>  4, Not applicable to our hospital |  |  |  |  |  |  | y |  |  | deployment |
| retired_nurses             | radio | Retired nurses were deployed to a COVID unit                                      | 1, All providers<br>  2, Some providers<br>  3, No providers<br>  4, Not applicable to our hospital |  |  |  |  |  |  | y |  |  | deployment |
| retired_physicians_were_re | radio | Retired physicians were reactivated and integrated into a neurocritical care unit | 1, All providers<br>  2, Some providers<br>  3, No providers<br>  4, Not applicable to our hospital |  |  |  |  |  |  | y |  |  | deployment |
| retired_nurses_were_deploy | radio | Retired nurses were deployed to a neurocritical care unit                         | 1, All providers<br>  2, Some providers<br>  3, No providers<br>  4, Not applicable to our hospital |  |  |  |  |  |  | y |  |  | deployment |
| nonnccsp                   | radio | Non-neurocritical                                                                 | 1, All providers                                                                                    |  |  |  |  |  |  | y |  |  | deployment |



|                            |       |                                                                                                       |                                                                                                     |  |  |  |  |  |  |   |  |            |
|----------------------------|-------|-------------------------------------------------------------------------------------------------------|-----------------------------------------------------------------------------------------------------|--|--|--|--|--|--|---|--|------------|
|                            |       | care based physicians were deployed to the neurocritical care unit                                    | 2, Some providers<br>  3, No providers<br>  4, Not applicable to our hospital                       |  |  |  |  |  |  |   |  |            |
| nonccsnurs                 | radio | Non-Neurocritical care based nurses were deployed to the neurocritical care unit                      | 1, All providers<br>  2, Some providers<br>  3, No providers<br>  4, Not applicable to our hospital |  |  |  |  |  |  | y |  | deployment |
| nonccsapp                  | radio | Non-Neurocritical care based advanced practice providers were deployed to the neurocritical care unit | 1, All providers<br>  2, Some providers<br>  3, No providers<br>  4, Not applicable to our hospital |  |  |  |  |  |  | y |  | deployment |
| neurointensivists_deployed | radio | Neurointensivists were deployed to other areas of the hospital such as wards/floor                    | 1, All providers<br>  2, Some providers<br>  3, No providers<br>  4, Not applicable to our hospital |  |  |  |  |  |  | y |  | deployment |
| neurocritical_care_pharmac | radio | Neurocritical care pharmacists                                                                        | 1, All providers<br>  2, Some                                                                       |  |  |  |  |  |  | y |  | deployment |

|                            |       |                                                                |                                                                                            |  |  |  |  |  |  |   |  |  |            |
|----------------------------|-------|----------------------------------------------------------------|--------------------------------------------------------------------------------------------|--|--|--|--|--|--|---|--|--|------------|
|                            |       | were deployed in a COVID unit                                  | providers   3, No providers   4, Not applicable to our hospital                            |  |  |  |  |  |  |   |  |  |            |
| nonnccvovid                | radio | Non Neurocritical Care pharmacists were deployed in the NCCU   | 1, All providers   2, Some providers   3, No providers   4, Not applicable to our hospital |  |  |  |  |  |  | y |  |  | deployment |
| non_intensive_care_pharmac | radio | Non intensive care pharmacists were deployed in the COVID unit | 1, All providers   2, Some providers   3, No providers   4, Not applicable to our hospital |  |  |  |  |  |  | y |  |  | deployment |
| non_inten_nccu             | radio | Non intensive care pharmacists were deployed in the NCCU       | 1, All providers   2, Some providers   3, No providers   4, Not applicable to our hospital |  |  |  |  |  |  | y |  |  | deployment |
| non_critical_care_allied_n | radio | Non critical care allied nursing providers (such as            | 1, All providers   2, Some providers   3, No                                               |  |  |  |  |  |  | y |  |  | deployment |

|                            |          |                                                                                                                                                                                |                                                                                                                                          |  |  |  |  |  |  |   |  |  |            |
|----------------------------|----------|--------------------------------------------------------------------------------------------------------------------------------------------------------------------------------|------------------------------------------------------------------------------------------------------------------------------------------|--|--|--|--|--|--|---|--|--|------------|
|                            |          | CRNAs) were deployed in the COVID unit                                                                                                                                         | providers   4, Not applicable to our hospital                                                                                            |  |  |  |  |  |  |   |  |  |            |
| crnas_in_nccu              | radio    | Non critical care allied nursing providers (such as CRNAs) were deployed in NCCU                                                                                               | 1, All providers   2, Some providers   3, No providers   4, Not applicable to our hospital                                               |  |  |  |  |  |  | y |  |  | deployment |
| critical_care_fellow_train | radio    | Critical care fellow trainees functioned at the level of a critical care attending                                                                                             | 1, All providers   2, Some providers   3, No providers   4, Not applicable to our hospital                                               |  |  |  |  |  |  | y |  |  | deployment |
| what_measures_were_put_in  | checkbox | What measures were put in place to educate critical care physicians, nurses, advanced practice providers, and pharmacists for management of COVID-19 and for non-neurocritical | 1, Learning how to prone patients   2, Lecture on COVID-19 disease   3, Lecture on the management of adult respiratory distress syndrome |  |  |  |  |  |  | y |  |  |            |

|                            |       |                                                                                                 |                                                                                                                   |  |  |  |  |  |                                      |   |    |  |                      |
|----------------------------|-------|-------------------------------------------------------------------------------------------------|-------------------------------------------------------------------------------------------------------------------|--|--|--|--|--|--------------------------------------|---|----|--|----------------------|
|                            |       | care physicians and nurses to manage the neurocritical ill patients? (Check all that may apply) | in patients with COVID-19 disease   4, Other                                                                      |  |  |  |  |  |                                      |   |    |  |                      |
| you_checked_other_option_f | text  | You checked "other" option for the previous question. Please clarify                            |                                                                                                                   |  |  |  |  |  | [what_measures_were_put_in(4)] = '1' | y | RH |  |                      |
| pt                         | radio | Availability of a dedicated physical therapist                                                  | 1, No change   2, Reduced availability   3, Not available at our hospital   4, Available only in a virtual medium |  |  |  |  |  |                                      | y |    |  | dedicated_pharmacist |
| ot                         | radio | Availability of a dedicated occupational therapist                                              | 1, No change   2, Reduced availability   3, Not available at our hospital   4, Available only in a virtual medium |  |  |  |  |  |                                      | y |    |  | dedicated_pharmacist |

|               |       |                                                 |                                                                                                                   |  |  |  |  |  |  |   |  |  |                      |
|---------------|-------|-------------------------------------------------|-------------------------------------------------------------------------------------------------------------------|--|--|--|--|--|--|---|--|--|----------------------|
| chaplain      | radio | Availability of a healthcare chaplain           | 1, No change   2, Reduced availability   3, Not available at our hospital   4, Available only in a virtual medium |  |  |  |  |  |  | y |  |  | dedicated_pharmacist |
| slp           | radio | Availability of speech and language pathologist | 1, No change   2, Reduced availability   3, Not available at our hospital   4, Available only in a virtual medium |  |  |  |  |  |  | y |  |  | dedicated_pharmacist |
| social_worker | radio | Availability of a social worker                 | 1, No change   2, Reduced availability   3, Not available at our hospital   4, Available only in a virtual medium |  |  |  |  |  |  | y |  |  | dedicated_pharmacist |

|                             |       |                                                 |                                                                                                                   |  |  |  |  |  |  |   |  |  |                      |
|-----------------------------|-------|-------------------------------------------------|-------------------------------------------------------------------------------------------------------------------|--|--|--|--|--|--|---|--|--|----------------------|
| cultural_mediator_interpre  | radio | Availability of a cultural mediator/interpreter | 1, No change   2, Reduced availability   3, Not available at our hospital   4, Available only in a virtual medium |  |  |  |  |  |  | y |  |  | dedicated_pharmacist |
| availability_of_a_dietician | radio | Availability of a dietician                     | 1, No change   2, Reduced availability   3, Not available at our hospital   4, Available only in a virtual medium |  |  |  |  |  |  | y |  |  | dedicated_pharmacist |
| availability_of_a_nursing   | radio | Availability of a certified nursing assistant   | 1, No change   2, Reduced availability   3, Not available at our hospital   4, Available only in a virtual medium |  |  |  |  |  |  | y |  |  | dedicated_pharmacist |

|                               |       |                                                                              |                                                                                                                                                 |  |  |  |  |  |  |   |  |  |                      |
|-------------------------------|-------|------------------------------------------------------------------------------|-------------------------------------------------------------------------------------------------------------------------------------------------|--|--|--|--|--|--|---|--|--|----------------------|
| availability_of_a_housekeeper | radio | Availability of a housekeeper                                                | 1, No change   2, Reduced availability   3, Not available at our hospital   4, Available only in a virtual medium                               |  |  |  |  |  |  | y |  |  | dedicated_pharmacist |
| hypertonic_saline_2_3_23_4    | radio | Hypertonic saline (3%, 5% 23.4% saline or any compounded preparation i.e 2%) | 1, No change in availability   2, Reduced availability   3, Unable to obtain   4, Non-formulary /not available in my country   5, I do not know |  |  |  |  |  |  | y |  |  | pharmaceuticals      |
| sodium_acetate_used_to_make   | radio | Sodium acetate used to make hypertonic solutions such and 2% or 3% saline    | 1, No change in availability   2, Reduced availability   3, Unable to obtain   4, Non-formulary                                                 |  |  |  |  |  |  | y |  |  | pharmaceuticals      |

|                |       |                |                                                                                                                                                 |  |  |  |  |  |   |  |  |                 |
|----------------|-------|----------------|-------------------------------------------------------------------------------------------------------------------------------------------------|--|--|--|--|--|---|--|--|-----------------|
|                |       |                | /not available in my country   5, I do not know                                                                                                 |  |  |  |  |  |   |  |  |                 |
| fludocortisone | radio | Fludocortisone | 1, No change in availability   2, Reduced availability   3, Unable to obtain   4, Non-formulary /not available in my country   5, I do not know |  |  |  |  |  | y |  |  | pharmaceuticals |
| slat_tabs      | radio | Salt tabs      | 1, No change in availability   2, Reduced availability   3, Unable to obtain   4, Non-formulary /not available in my country   5, I do not know |  |  |  |  |  | y |  |  | pharmaceuticals |



|                 |       |                                           |                                                                                                                                                 |  |  |  |  |  |  |   |  |  |                 |
|-----------------|-------|-------------------------------------------|-------------------------------------------------------------------------------------------------------------------------------------------------|--|--|--|--|--|--|---|--|--|-----------------|
| mannitol        | radio | Mannitol (20 or 25% solutions)            | 1, No change in availability   2, Reduced availability   3, Unable to obtain   4, Non-formulary /not available in my country   5, I do not know |  |  |  |  |  |  | y |  |  | pharmaceuticals |
| propofol        | radio | Propofol                                  | 1, No change in availability   2, Reduced availability   3, Unable to obtain   4, Non-formulary /not available in my country   5, I do not know |  |  |  |  |  |  | y |  |  | pharmaceuticals |
| dexmedetomidine | radio | Dexmedetomidine (vials or pre-mixed bags) | 1, No change in availability   2, Reduced availability   3, Unable to                                                                           |  |  |  |  |  |  | y |  |  | pharmaceuticals |

|                               |       |           |                                                                                                                                                                                                    |  |  |  |  |  |   |  |  |                 |
|-------------------------------|-------|-----------|----------------------------------------------------------------------------------------------------------------------------------------------------------------------------------------------------|--|--|--|--|--|---|--|--|-----------------|
|                               |       |           | obtain  <br>4, Non-<br>formulary<br>/not<br>available<br>in my<br>country  <br>5, I do not<br>know                                                                                                 |  |  |  |  |  |   |  |  |                 |
| ketamine                      | radio | Ketamine  | 1, No<br>change in<br>availabilit<br>y   2,<br>Reduced<br>availabilit<br>y   3,<br>Unable to<br>obtain  <br>4, Non-<br>formulary<br>/not<br>available<br>in my<br>country  <br>5, I do not<br>know |  |  |  |  |  | y |  |  | pharmaceuticals |
| acetaminophen_in<br>travenous | radio | Midazolam | 1, No<br>change in<br>availabilit<br>y   2,<br>Reduced<br>availabilit<br>y   3,<br>Unable to<br>obtain  <br>4, Non-<br>formulary<br>/not<br>available<br>in my<br>country                          |  |  |  |  |  | y |  |  | pharmaceuticals |

|                 |       |            |                                                                                                                                                 |  |  |  |  |  |   |  |  |                 |
|-----------------|-------|------------|-------------------------------------------------------------------------------------------------------------------------------------------------|--|--|--|--|--|---|--|--|-----------------|
|                 |       |            | 5, I do not know                                                                                                                                |  |  |  |  |  |   |  |  |                 |
| lorazepam       | radio | Lorazepam  | 1, No change in availability   2, Reduced availability   3, Unable to obtain   4, Non-formulary /not available in my country   5, I do not know |  |  |  |  |  | y |  |  | pharmaceuticals |
| diazepam        | radio | Diazepam   | 1, No change in availability   2, Reduced availability   3, Unable to obtain   4, Non-formulary /not available in my country   5, I do not know |  |  |  |  |  | y |  |  | pharmaceuticals |
| benzodiazepines | radio | Rocuronium | 1, No change in availability   2, Reduced availability                                                                                          |  |  |  |  |  | y |  |  | pharmaceuticals |

|                        |       |               |                                                                                                                                                                                            |  |  |  |  |  |   |  |  |                 |
|------------------------|-------|---------------|--------------------------------------------------------------------------------------------------------------------------------------------------------------------------------------------|--|--|--|--|--|---|--|--|-----------------|
|                        |       |               | y   3,<br>Unable to<br>obtain  <br>4, Non-<br>formulary<br>/not<br>available<br>in my<br>country  <br>5, I do not<br>know                                                                  |  |  |  |  |  |   |  |  |                 |
| neuromuscular_blockade | radio | Vecuronium    | 1, No<br>change in<br>availability   2,<br>Reduced<br>availability   3,<br>Unable to<br>obtain  <br>4, Non-<br>formulary<br>/not<br>available<br>in my<br>country  <br>5, I do not<br>know |  |  |  |  |  | y |  |  | pharmaceuticals |
| cisatracurium          | radio | Cisatracurium | 1, No<br>change in<br>availability   2,<br>Reduced<br>availability   3,<br>Unable to<br>obtain  <br>4, Non-<br>formulary<br>/not<br>available<br>in my                                     |  |  |  |  |  | y |  |  | pharmaceuticals |

|               |       |               |                                                                                                                                                                                                    |  |  |  |  |  |   |  |  |                 |
|---------------|-------|---------------|----------------------------------------------------------------------------------------------------------------------------------------------------------------------------------------------------|--|--|--|--|--|---|--|--|-----------------|
|               |       |               | country  <br>5, I do not<br>know                                                                                                                                                                   |  |  |  |  |  |   |  |  |                 |
| atracurium    | radio | Atracurium    | 1, No<br>change in<br>availabilit<br>y   2,<br>Reduced<br>availabilit<br>y   3,<br>Unable to<br>obtain  <br>4, Non-<br>formulary<br>/not<br>available<br>in my<br>country  <br>5, I do not<br>know |  |  |  |  |  | y |  |  | pharmaceuticals |
| phenobarbital | radio | Phenobarbital | 1, No<br>change in<br>availabilit<br>y   2,<br>Reduced<br>availabilit<br>y   3,<br>Unable to<br>obtain  <br>4, Non-<br>formulary<br>/not<br>available<br>in my<br>country  <br>5, I do not<br>know |  |  |  |  |  | y |  |  | pharmaceuticals |
| pentobarbital | radio | Pentobarbital | 1, No<br>change in<br>availabilit<br>y   2,<br>Reduced                                                                                                                                             |  |  |  |  |  | y |  |  | pharmaceuticals |

|            |       |            |                                                                                                                                                                                                            |  |  |  |  |  |   |  |  |                 |
|------------|-------|------------|------------------------------------------------------------------------------------------------------------------------------------------------------------------------------------------------------------|--|--|--|--|--|---|--|--|-----------------|
|            |       |            | <p>availability   3,<br/>         Unable to obtain  <br/>         4, Non-formulary /not available in my country  <br/>         5, I do not know</p>                                                        |  |  |  |  |  |   |  |  |                 |
| thiopental | radio | Thiopental | <p>1, No change in availability   2,<br/>         Reduced availability   3,<br/>         Unable to obtain  <br/>         4, Non-formulary /not available in my country  <br/>         5, I do not know</p> |  |  |  |  |  | y |  |  | pharmaceuticals |
| phenytoin  | radio | Phenytoin  | <p>1, No change in availability   2,<br/>         Reduced availability   3,<br/>         Unable to obtain  <br/>         4, Non-formulary /not available</p>                                               |  |  |  |  |  | y |  |  | pharmaceuticals |

|               |       |                         |                                                                                                                                                 |  |  |  |  |  |   |  |  |                 |
|---------------|-------|-------------------------|-------------------------------------------------------------------------------------------------------------------------------------------------|--|--|--|--|--|---|--|--|-----------------|
|               |       |                         | in my country   5, I do not know                                                                                                                |  |  |  |  |  |   |  |  |                 |
| fosphenytoin  | radio | Fosphenytoin            | 1, No change in availability   2, Reduced availability   3, Unable to obtain   4, Non-formulary /not available in my country   5, I do not know |  |  |  |  |  | y |  |  | pharmaceuticals |
| levetiracetam | radio | Levetiracetam           | 1, No change in availability   2, Reduced availability   3, Unable to obtain   4, Non-formulary /not available in my country   5, I do not know |  |  |  |  |  | y |  |  | pharmaceuticals |
| valproic_acid | radio | Valproic acid/valproate | 1, No change in availability   2,                                                                                                               |  |  |  |  |  | y |  |  | pharmaceuticals |

|                     |       |                                                   |                                                                                                                                                 |  |  |  |  |  |   |  |  |                 |
|---------------------|-------|---------------------------------------------------|-------------------------------------------------------------------------------------------------------------------------------------------------|--|--|--|--|--|---|--|--|-----------------|
|                     |       |                                                   | Reduced availability   3, Unable to obtain   4, Non-formulary /not available in my country   5, I do not know                                   |  |  |  |  |  |   |  |  |                 |
| lacosamide          | radio | Lacosamide                                        | 1, No change in availability   2, Reduced availability   3, Unable to obtain   4, Non-formulary /not available in my country   5, I do not know |  |  |  |  |  | y |  |  | pharmaceuticals |
| bronchodilators_mdi | radio | Bronchodilators MDI/nebulizers/other formulations | 1, No change in availability   2, Reduced availability   3, Unable to obtain   4, Non-formulary /not                                            |  |  |  |  |  | y |  |  | pharmaceuticals |



|                          |       |                                                                            |                                                                                                                                                 |  |  |  |  |  |   |  |  |                 |
|--------------------------|-------|----------------------------------------------------------------------------|-------------------------------------------------------------------------------------------------------------------------------------------------|--|--|--|--|--|---|--|--|-----------------|
|                          |       |                                                                            | available in my country   5, I do not know                                                                                                      |  |  |  |  |  |   |  |  |                 |
| acetaminophen_ental_form | radio | Acetaminophen (enteral formulation/intravenous formulation) or paracetamol | 1, No change in availability   2, Reduced availability   3, Unable to obtain   4, Non-formulary /not available in my country   5, I do not know |  |  |  |  |  | y |  |  | pharmaceuticals |
| nicardipine              | radio | Nicardipine                                                                | 1, No change in availability   2, Reduced availability   3, Unable to obtain   4, Non-formulary /not available in my country   5, I do not know |  |  |  |  |  | y |  |  | pharmaceuticals |
| clevipine                | radio | Clevipine                                                                  | 1, No change in availability                                                                                                                    |  |  |  |  |  | y |  |  | pharmaceuticals |

|            |       |            |                                                                                                                                                                                                    |  |  |  |  |  |   |  |  |                 |
|------------|-------|------------|----------------------------------------------------------------------------------------------------------------------------------------------------------------------------------------------------|--|--|--|--|--|---|--|--|-----------------|
|            |       |            | y   2,<br>Reduced<br>availabilit<br>y   3,<br>Unable to<br>obtain  <br>4, Non-<br>formulary<br>/not<br>available<br>in my<br>country  <br>5, I do not<br>know                                      |  |  |  |  |  |   |  |  |                 |
| nimodipine | radio | Nimodipine | 1, No<br>change in<br>availabilit<br>y   2,<br>Reduced<br>availabilit<br>y   3,<br>Unable to<br>obtain  <br>4, Non-<br>formulary<br>/not<br>available<br>in my<br>country  <br>5, I do not<br>know |  |  |  |  |  | y |  |  | pharmaceuticals |
| nefopam    | radio | Nefopam    | 1, No<br>change in<br>availabilit<br>y   2,<br>Reduced<br>availabilit<br>y   3,<br>Unable to<br>obtain  <br>4, Non-<br>formulary                                                                   |  |  |  |  |  | y |  |  | pharmaceuticals |

|               |       |               |                                                                                                                                                 |  |  |  |  |  |   |  |  |                 |
|---------------|-------|---------------|-------------------------------------------------------------------------------------------------------------------------------------------------|--|--|--|--|--|---|--|--|-----------------|
|               |       |               | /not available in my country   5, I do not know                                                                                                 |  |  |  |  |  |   |  |  |                 |
| fentanyl      | radio | Fentanyl      | 1, No change in availability   2, Reduced availability   3, Unable to obtain   4, Non-formulary /not available in my country   5, I do not know |  |  |  |  |  | y |  |  | pharmaceuticals |
| morphine      | radio | Morphine      | 1, No change in availability   2, Reduced availability   3, Unable to obtain   4, Non-formulary /not available in my country   5, I do not know |  |  |  |  |  | y |  |  | pharmaceuticals |
| hydromorphone | radio | Hydromorphone | 1, No change in                                                                                                                                 |  |  |  |  |  | y |  |  | pharmaceuticals |

|            |       |            |                                                                                                                                                       |  |  |  |  |  |   |  |  |                 |
|------------|-------|------------|-------------------------------------------------------------------------------------------------------------------------------------------------------|--|--|--|--|--|---|--|--|-----------------|
|            |       |            | availability   2,<br>Reduced availability   3,<br>Unable to obtain   4, Non-formulary /not available in my country   5, I do not know                 |  |  |  |  |  |   |  |  |                 |
| alfentanil | radio | Alfentanil | 1, No change in availability   2,<br>Reduced availability   3,<br>Unable to obtain   4, Non-formulary /not available in my country   5, I do not know |  |  |  |  |  | y |  |  | pharmaceuticals |
| sufentanil | radio | Sufentanil | 1, No change in availability   2,<br>Reduced availability   3,<br>Unable to obtain   4, Non-                                                          |  |  |  |  |  | y |  |  | pharmaceuticals |

|                            |       |                                         |                                                                                                                                                 |  |  |  |  |  |   |  |  |                 |
|----------------------------|-------|-----------------------------------------|-------------------------------------------------------------------------------------------------------------------------------------------------|--|--|--|--|--|---|--|--|-----------------|
|                            |       |                                         | formulary /not available in my country   5, I do not know                                                                                       |  |  |  |  |  |   |  |  |                 |
| remifentanil               | radio | Remifentanil                            | 1, No change in availability   2, Reduced availability   3, Unable to obtain   4, Non-formulary /not available in my country   5, I do not know |  |  |  |  |  | y |  |  | pharmaceuticals |
| antimicrobials_antibiotics | radio | Antimicrobials (antibiotics/antivirals) | 1, No change in availability   2, Reduced availability   3, Unable to obtain   4, Non-formulary /not available in my country   5, I do not know |  |  |  |  |  | y |  |  | pharmaceuticals |

|                            |          |                                                                                     |                                                                                                                                                                                                                                                                                                                                                                                                                                                                                                                                                                                                                 |  |  |  |  |                                      |   |  |  |                     |  |
|----------------------------|----------|-------------------------------------------------------------------------------------|-----------------------------------------------------------------------------------------------------------------------------------------------------------------------------------------------------------------------------------------------------------------------------------------------------------------------------------------------------------------------------------------------------------------------------------------------------------------------------------------------------------------------------------------------------------------------------------------------------------------|--|--|--|--|--------------------------------------|---|--|--|---------------------|--|
| indicate_if_any_other_medi | text     | Indicate if any other mediations were in short supply during the pandemic           |                                                                                                                                                                                                                                                                                                                                                                                                                                                                                                                                                                                                                 |  |  |  |  |                                      |   |  |  |                     |  |
| how_was_the_drug_shortage  | checkbox | How was the drug shortage mitigated during the pandemic? (Check all that may apply) | 1, Using benzodiazepines bolus or infusion for sedation   2, Using oral opioids for sedation   3, Use of ketamine for sedation   4, Use of fentanyl infusion for sedation   5, Use of remifentanil infusion for sedation   6, Use of inhalational anesthetics for sedation   7, Switching propofol based sedation to dexmedetomidine-based sedation   8, Switching dexmedetomidine based-sedation to propofol-based sedation   11, We obtained non-formulary medications   12, We received medications from non-preferred manufacturers   9, Other   10, We did not experience any critical care drug shortages |  |  |  |  |                                      | y |  |  |                     |  |
| you_checked_other_response | text     | You checked the "other" response to the previous question. Please elaborate         |                                                                                                                                                                                                                                                                                                                                                                                                                                                                                                                                                                                                                 |  |  |  |  | [how_was_the_drug_shortage(9)] = '1' | y |  |  |                     |  |
| lab_draws_and_processing   | radio    | Lab draws and processing                                                            | 1, No change in availability   2, Reduced availability   3, Increased availability   4, Does not apply to my set up                                                                                                                                                                                                                                                                                                                                                                                                                                                                                             |  |  |  |  |                                      | y |  |  | lab_imaging_and_oth |  |
| ct_scans                   | radio    | CT scans (regular or routine, requiring intrahospital transport)                    | 1, No change in availability   2, Reduced availability   3,                                                                                                                                                                                                                                                                                                                                                                                                                                                                                                                                                     |  |  |  |  |                                      | y |  |  | lab_imaging_and_oth |  |

|                      |       |                      |                                                                                                                              |  |  |  |  |  |   |  |  |                     |
|----------------------|-------|----------------------|------------------------------------------------------------------------------------------------------------------------------|--|--|--|--|--|---|--|--|---------------------|
|                      |       |                      | Increased availability   4,<br>Does not apply to my set up                                                                   |  |  |  |  |  |   |  |  |                     |
| portable_ct_scan     | radio | Portable CT scan     | 1, No change in availability   2,<br>Reduced availability   3,<br>Increased availability   4,<br>Does not apply to my set up |  |  |  |  |  | y |  |  | lab_imaging_and_oth |
| mrisc                | radio | MRI                  | 1, No change in availability   2,<br>Reduced availability   3,<br>Increased availability   4,<br>Does not apply to my set up |  |  |  |  |  | y |  |  | lab_imaging_and_oth |
| transcranial_doppler | radio | Transcranial Doppler | 1, No change in availability   2,<br>Reduced availability   3,<br>Increased availability   4,                                |  |  |  |  |  | y |  |  | lab_imaging_and_oth |

|                            |       |                                                 |                                                                                                                     |  |  |  |  |  |   |  |  |                           |
|----------------------------|-------|-------------------------------------------------|---------------------------------------------------------------------------------------------------------------------|--|--|--|--|--|---|--|--|---------------------------|
|                            |       |                                                 | Does not apply to my set up                                                                                         |  |  |  |  |  |   |  |  |                           |
| duplex_scans               | radio | Ultrasound                                      | 1, No change in availability   2, Reduced availability   3, Increased availability   4, Does not apply to my set up |  |  |  |  |  | y |  |  | lab_imaging_and_o<br>ther |
| echocardiograms            | radio | Echocardiogram                                  | 1, No change in availability   2, Reduced availability   3, Increased availability   4, Does not apply to my set up |  |  |  |  |  | y |  |  | lab_imaging_and_o<br>ther |
| peripherally_placed_centra | radio | Peripherally placed central line placement team | 1, No change in availability   2, Reduced availability   3, Increased availability   4, Does not apply to my set up |  |  |  |  |  | y |  |  | lab_imaging_and_o<br>ther |



|                            |       |                                                                                                                        |                                                                                                                                                                                                                                                                                                                                                                                                   |  |  |  |  |  |   |  |  |  |                      |
|----------------------------|-------|------------------------------------------------------------------------------------------------------------------------|---------------------------------------------------------------------------------------------------------------------------------------------------------------------------------------------------------------------------------------------------------------------------------------------------------------------------------------------------------------------------------------------------|--|--|--|--|--|---|--|--|--|----------------------|
| please_indicate_if_you_obs | text  | Please indicate if you observed changes in any other areas not specified above                                         |                                                                                                                                                                                                                                                                                                                                                                                                   |  |  |  |  |  |   |  |  |  |                      |
| at_the_time_of_this_survey | radio | At the time of this survey, it has been _ weeks since the surge. Fill in the blanks with the most appropriate response | 1, less than 2 weeks  <br>2, 2-4 weeks  <br>3, greater than 4 weeks  <br>4, My institution did not experience any surge in patients  <br>5, We are still in the midst of the surge                                                                                                                                                                                                                |  |  |  |  |  | y |  |  |  |                      |
| location                   | radio | NCCU/CCU location                                                                                                      | 1, Had a surge and completely back to pre-surge standards   2, Had a surge, but functioning at surge standards   3, In the midst of the surge and functioning at surge standards   4, In the midst of the surge, but functioning at pre-surge standards   5, Did not experience a surge and functioning at pre-surge standards   6, Did not experience a surge but functioning at surge standards |  |  |  |  |  | y |  |  |  | post_surge_follow_up |
| nccu_physician_staffing    | radio | NCCU/CCU physician staffing                                                                                            | 1, Had a surge and completely back to pre-surge standards   2, Had a surge, but functioning at                                                                                                                                                                                                                                                                                                    |  |  |  |  |  | y |  |  |  | post_surge_follow_up |

|                            |       |                                              |                                                                                                                                                                                                                                                                                                                                                                                                   |  |  |  |   |  |  |                      |
|----------------------------|-------|----------------------------------------------|---------------------------------------------------------------------------------------------------------------------------------------------------------------------------------------------------------------------------------------------------------------------------------------------------------------------------------------------------------------------------------------------------|--|--|--|---|--|--|----------------------|
|                            |       |                                              | surge standards   3, In the midst of the surge and functioning at surge standards   4, In the midst of the surge, but functioning at pre-surge standards   5, Did not experience a surge and functioning at pre-surge standards   6, Did not experience a surge but functioning at surge standards                                                                                                |  |  |  |   |  |  |                      |
| nccu_nursing_staffing      | radio | NCCU/CCU nursing staffing                    | 1, Had a surge and completely back to pre-surge standards   2, Had a surge, but functioning at surge standards   3, In the midst of the surge and functioning at surge standards   4, In the midst of the surge, but functioning at pre-surge standards   5, Did not experience a surge and functioning at pre-surge standards   6, Did not experience a surge but functioning at surge standards |  |  |  | y |  |  | post_surge_follow_up |
| nccu_advanced_practice_pro | radio | NCCU/CCU advanced practice provider staffing | 1, Had a surge and completely back to pre-surge standards   2, Had a surge, but functioning at surge standards   3, In the midst of the surge and functioning at surge standards   4, In the midst of the surge, but functioning at pre-surge standards   5, Did not experience a surge and functioning at pre-surge standards   6, Did not experience a surge but functioning at surge standards |  |  |  | y |  |  | post_surge_follow_up |
| nccu_resident_trainee_avai | radio | NCCU/CCU resident trainee availability       | 1, Had a surge and completely back to pre-surge standards   2, Had a surge, but functioning at surge standards   3, In the midst of the surge and functioning at surge standards   4, In the midst                                                                                                                                                                                                |  |  |  | y |  |  | post_surge_follow_up |

|                          |       |                              |                                                                                                                                                                                                                                                                                                                                                                                                   |  |  |  |   |  |  |                      |
|--------------------------|-------|------------------------------|---------------------------------------------------------------------------------------------------------------------------------------------------------------------------------------------------------------------------------------------------------------------------------------------------------------------------------------------------------------------------------------------------|--|--|--|---|--|--|----------------------|
|                          |       |                              | of the surge, but functioning at pre-surge standards   5, Did not experience a surge and functioning at pre-surge standards   6, Did not experience a surge but functioning at surge standards                                                                                                                                                                                                    |  |  |  |   |  |  |                      |
| nccu_fellow_availability | radio | NCCU/CCU fellow availability | 1, Had a surge and completely back to pre-surge standards   2, Had a surge, but functioning at surge standards   3, In the midst of the surge and functioning at surge standards   4, In the midst of the surge, but functioning at pre-surge standards   5, Did not experience a surge and functioning at pre-surge standards   6, Did not experience a surge but functioning at surge standards |  |  |  | y |  |  | post_surge_follow_up |
| nccu_admissions          | radio | NCCU/CCU admissions          | 1, Had a surge and completely back to pre-surge standards   2, Had a surge, but functioning at surge standards   3, In the midst of the surge and functioning at surge standards   4, In the midst of the surge, but functioning at pre-surge standards   5, Did not experience a surge and functioning at pre-surge standards   6, Did not experience a surge but functioning at surge standards |  |  |  | y |  |  | post_surge_follow_up |
| faculty_meetings         | radio | Faculty meetings             | 1, Had a surge and completely back to pre-surge standards   2, Had a surge, but functioning at surge standards   3, In the midst of the surge and functioning at surge standards   4, In the midst of the surge, but functioning at pre-surge standards   5, Did not experience a surge and                                                                                                       |  |  |  | y |  |  | post_surge_follow_up |

|                             |       |                                                      |                                                                                                                                                                                                                                                                                                                                                                                                   |  |  |  |   |  |                      |
|-----------------------------|-------|------------------------------------------------------|---------------------------------------------------------------------------------------------------------------------------------------------------------------------------------------------------------------------------------------------------------------------------------------------------------------------------------------------------------------------------------------------------|--|--|--|---|--|----------------------|
|                             |       |                                                      | functioning at pre-surge standards   6, Did not experience a surge but functioning at surge standards                                                                                                                                                                                                                                                                                             |  |  |  |   |  |                      |
| post_surge_journal_club     | radio | Journal club                                         | 1, Had a surge and completely back to pre-surge standards   2, Had a surge, but functioning at surge standards   3, In the midst of the surge and functioning at surge standards   4, In the midst of the surge, but functioning at pre-surge standards   5, Did not experience a surge and functioning at pre-surge standards   6, Did not experience a surge but functioning at surge standards |  |  |  | y |  | post_surge_follow_up |
| post_surge_grand_rounds     | radio | Grand rounds                                         | 1, Had a surge and completely back to pre-surge standards   2, Had a surge, but functioning at surge standards   3, In the midst of the surge and functioning at surge standards   4, In the midst of the surge, but functioning at pre-surge standards   5, Did not experience a surge and functioning at pre-surge standards   6, Did not experience a surge but functioning at surge standards |  |  |  | y |  | post_surge_follow_up |
| mortality_morbidity_quality | radio | Mortality & Morbidity / Quality improvement meetings | 1, Had a surge and completely back to pre-surge standards   2, Had a surge, but functioning at surge standards   3, In the midst of the surge and functioning at surge standards   4, In the midst of the surge, but functioning at pre-surge standards   5, Did not experience a surge and functioning at pre-surge standards   6, Did not experience                                            |  |  |  | y |  | post_surge_follow_up |

|                            |          |                                                                                                                                                                                                                                                 |                                                                                                                                                                                                                                                                                                                                                                                          |  |  |  |  |  |                                       |   |  |  |
|----------------------------|----------|-------------------------------------------------------------------------------------------------------------------------------------------------------------------------------------------------------------------------------------------------|------------------------------------------------------------------------------------------------------------------------------------------------------------------------------------------------------------------------------------------------------------------------------------------------------------------------------------------------------------------------------------------|--|--|--|--|--|---------------------------------------|---|--|--|
|                            |          |                                                                                                                                                                                                                                                 | a surge but functioning at surge standards                                                                                                                                                                                                                                                                                                                                               |  |  |  |  |  |                                       |   |  |  |
| please_choose_from_the_fol | checkbox | Please choose from the following options areas in which you are currently struggling with in delivering care to the neurocritically ill.<br>NCCU = dedicated neurocritical care unit<br>CCU = general/mixed medical-surgical critical care unit | 1, NCCU/CCU location of the ICU (displaced partially or completely from its original location since the pandemic to cohort COVID patients)   2, NCCU/CCU staffing (physician/nursing/APP)   3, NCCU/CCU staffing (trainees)   4, NCCU/CCU workflow (rounding/communication)   5, NCCU/CCU supply (equipment/drugs)   6, Other areas, please specify                                      |  |  |  |  |  | y                                     |   |  |  |
| you_chose_other_option_pel | notes    | You chose other option, please elaborate                                                                                                                                                                                                        |                                                                                                                                                                                                                                                                                                                                                                                          |  |  |  |  |  | [please_choose_from_the_fol(6)] = '1' | y |  |  |
| please_provide_details_on  | checkbox | Please provide a list of any quality concerns you experienced while delivering care to the neurocritically ill patients during this pandemic (Check all that may apply)                                                                         | 5, Concern for health-care provider safety   6, Concern for patient safety   7, Concern for the physician to patient ratio   8, Concern for the nurse to patient ratio   9, Concern for the pharmacist to patient ratio   10, Concern for neurocritically ill patients cared for by non-neurocritically trained care nurses   11, Other   12, We did not experience any quality concerns |  |  |  |  |  | y                                     |   |  |  |

|                                |       |                                                                                                                                                                                                                                                                                                                                                |  |  |       |  |  |  |                                           |   |    |  |  |
|--------------------------------|-------|------------------------------------------------------------------------------------------------------------------------------------------------------------------------------------------------------------------------------------------------------------------------------------------------------------------------------------------------|--|--|-------|--|--|--|-------------------------------------------|---|----|--|--|
| you_checked_othe<br>r_option_i | text  | You checked other option in the previous question . Please elaborate                                                                                                                                                                                                                                                                           |  |  |       |  |  |  | [please_provide_de<br>tails_on(11)] = '1' | y |    |  |  |
| indicate_your_inte<br>rest_in  | yesno | Can we contact you for a 15-minute semi-structured interview?                                                                                                                                                                                                                                                                                  |  |  |       |  |  |  |                                           | y | RH |  |  |
| thank_you_for_yo<br>ur_interes | text  | Thank you for your interest in a semi-structured interview. In order to facilitate the interview process, please provide your e-mail address. (This will be a more discussion-based interview using open-ended questions pertaining to areas that we were unable to cover in the survey or questions for whom answer choices were not provided |  |  | email |  |  |  | [indicate_your_inte<br>rest_in] = '1'     | y | RH |  |  |

|                            |      |                                                                                                                                                                                                                                                                                        |  |  |  |  |  |  |                                   |   |    |  |  |
|----------------------------|------|----------------------------------------------------------------------------------------------------------------------------------------------------------------------------------------------------------------------------------------------------------------------------------------|--|--|--|--|--|--|-----------------------------------|---|----|--|--|
|                            |      | or other areas you wish to report)                                                                                                                                                                                                                                                     |  |  |  |  |  |  |                                   |   |    |  |  |
| phone_number               | text | Thank you for your interest in a semi-structured interview. In order to facilitate the interview process, please provide a phone number where we can reach you.                                                                                                                        |  |  |  |  |  |  | [indicate_your_interest_in] = '1' |   | RH |  |  |
| we_would_like_to_include_y | text | For your participation in this study, we would like to include you as a co-author in peer-reviewed publications related to this study. Please provide us with your full name, including middle initial, your title, affiliations, name of your hospital, and a contact e-mail address. |  |  |  |  |  |  |                                   | y |    |  |  |
