# Supplementary material
Source: PubMed Central journal article supplement (PMC8900891)
Supplement: ana-34-209-s002.pdf [file ana-34-209-s002.pdf]

**Supplementary Digital Content**  
**Semi-Structured Interview Questionnaire**

|                              |                                                                                                                                                                                                                                                         |
|------------------------------|---------------------------------------------------------------------------------------------------------------------------------------------------------------------------------------------------------------------------------------------------------|
| explore_with_the_participant | <p>Describe in your own words, the impact of the pandemic on neurocritical care, specifically, looking back on how this impacted your neuro ICU or the care of the neurological patients.</p> <p>What changes impacted the neuro patients the most?</p> |
|------------------------------|---------------------------------------------------------------------------------------------------------------------------------------------------------------------------------------------------------------------------------------------------------|

second\_surge\_wave

Describe in your own words your experiences with the following regarding the second or subsequent surge/wave

- 1) How many surges did you experience?
- 2) How was the impact of these subsequent surges compared to the first (admissions, census, resource utilization, ventilator availability, ancillary staff/study availability, and other domains)
- 3) What new challenges did you experience during these surges?
- 4) What new measures put into place?
- 5) Other areas you want to comment on, please elaborate

diversion

Did your hospital had to divert neuro patients that they would otherwise have admitted?

Areas to areas to comment include

- 1) Whether diversion was put into place.
- 2) If so, how long and for what diagnoses
- 3) If you were aware of any issues related to the diversion.
- 4) Anything you would like to comment on regarding diversion/ denial of patients.

research\_mission

Describe your experience regarding the impact of the pandemic on research/academic missions.

Areas to explore here include

- 1) A shutdown of research activities? If yes, for how long?
- 2) What type of research affected (Clinical research, basic science research, funded vs. non-funded research)
- 3) Are the programs back on track?
- 4) Did academic productivity suffer during the pandemic?
- 5) Did academic activity for students/residents/fellows suffer?
- 6) Anything else you would like to comment on regarding research/academics/didactics

|                                   |                                                                                                                                                                                                                                                                                                                                                                                                                                                                                                                                                                                                                                                                                                                                                                                                                                                                                             |
|-----------------------------------|---------------------------------------------------------------------------------------------------------------------------------------------------------------------------------------------------------------------------------------------------------------------------------------------------------------------------------------------------------------------------------------------------------------------------------------------------------------------------------------------------------------------------------------------------------------------------------------------------------------------------------------------------------------------------------------------------------------------------------------------------------------------------------------------------------------------------------------------------------------------------------------------|
| <p>describe_long_term_changes</p> | <p>Describe your experience regarding any intermediate or long-term changes in neurocritical care delivery as a result of measures pandemic.</p> <p>Areas to comment here include:</p> <ol style="list-style-type: none"><li>1) Unit structure: Maintaining COVID-cohorting beds. Is your Neuro ICU or general ICU back on pre-pandemic status? Or how is it functioning today compared to 2020 in the height of the pandemic.</li><li>2) Negative pressure rooms set up? Or make-shift/exhaust systems, etc.</li><li>3) Critical care resource allocation: Having resources and a back-up pool of providers. traveler nurses, per diems, extra shifts for COVID ICU, burnout, morale, or any other areas you saw changes at your institution.</li><li>4) Daily rounding.</li><li>5) Meetings/administrative activities.</li><li>6) Any other areas that you would like to cover.</li></ol> |
|-----------------------------------|---------------------------------------------------------------------------------------------------------------------------------------------------------------------------------------------------------------------------------------------------------------------------------------------------------------------------------------------------------------------------------------------------------------------------------------------------------------------------------------------------------------------------------------------------------------------------------------------------------------------------------------------------------------------------------------------------------------------------------------------------------------------------------------------------------------------------------------------------------------------------------------------|

|                                    |                                                                                                                                                                                                                                                         |
|------------------------------------|---------------------------------------------------------------------------------------------------------------------------------------------------------------------------------------------------------------------------------------------------------|
| <p>would_you_like_to_share_wi</p>  | <p>Any other information that you would like to share with us that would be relevant to publish regarding NCC delivery in the pandemic?</p> <p>Describe any positive takeaways from the pandemic regarding neurocritical care delivery.</p>             |
| <p>explore_with_the_participad</p> | <p>Describe in your own words, the impact of the pandemic on neurocritical care, specifically, looking back on how this impacted your neuro ICU or the care of the neurological patients.</p> <p>What changes impacted the neuro patients the most?</p> |

|                          |                                                                                                                                                                                                                                                                                                                                                                                                                                                                                                                                                                                                          |
|--------------------------|----------------------------------------------------------------------------------------------------------------------------------------------------------------------------------------------------------------------------------------------------------------------------------------------------------------------------------------------------------------------------------------------------------------------------------------------------------------------------------------------------------------------------------------------------------------------------------------------------------|
| <p>second_surge_wave</p> | <p>Describe in your own words your experiences with the following regarding the second or subsequent surge/wave</p> <ol style="list-style-type: none"><li>1) How many surges did you experience?</li><li>2) How was the impact of these subsequent surges compared to the first (admissions, census, resource utilization, ventilator availability, ancillary staff/study availability, and other domains)</li><li>3) What new challenges did you experience during these surges?</li><li>4) What new measures put into place?</li><li>5) Other areas you want to comment on, please elaborate</li></ol> |
| <p>diversion</p>         | <p>Did your hospital had to divert neuro patients that they would otherwise have admitted?</p> <p>Areas to areas to comment include</p> <ol style="list-style-type: none"><li>1) Whether diversion was put into place.</li><li>2) If so, how long and for what diagnoses</li><li>3) If you were aware of any issues related to the diversion.</li><li>4) Anything you would like to comment on regarding diversion/ denial of patients.</li></ol>                                                                                                                                                        |

|                                   |                                                                                                                                                                                                                                                                                                                                                                                                                                                                                                                                                                                                                                                                                                                                                                                                                                                                                                    |
|-----------------------------------|----------------------------------------------------------------------------------------------------------------------------------------------------------------------------------------------------------------------------------------------------------------------------------------------------------------------------------------------------------------------------------------------------------------------------------------------------------------------------------------------------------------------------------------------------------------------------------------------------------------------------------------------------------------------------------------------------------------------------------------------------------------------------------------------------------------------------------------------------------------------------------------------------|
| <p>research_mission</p>           | <p>Describe your experience regarding the impact of the pandemic on research/academic missions.</p> <p>Areas to explore here include</p> <ol style="list-style-type: none"> <li>1) A shutdown of research activities? If yes, for how long?</li> <li>2) What type of research affected (Clinical research, basic science research, funded vs. non-funded research)</li> <li>3) Are the programs back on track?</li> <li>4) Did academic productivity suffer during the pandemic?</li> <li>5) Did academic activity for students/residents/fellows suffer?</li> <li>6) Anything else you would like to comment on regarding research/academics/didactics</li> </ol>                                                                                                                                                                                                                                 |
| <p>describe_long_term_changes</p> | <p>Describe your experience regarding any intermediate or long-term changes in neurocritical care delivery as a result of measures pandemic.</p> <p>Areas to comment here include:</p> <ol style="list-style-type: none"> <li>1) Unit structure: Maintaining COVID-cohorting beds. Is your Neuro ICU or general ICU back on pre-pandemic status? Or how is it functioning today compared to 2020 in the height of the pandemic.</li> <li>2) Negative pressure rooms set up? Or make-shift/exhaust systems, etc.</li> <li>3) Critical care resource allocation: Having resources and a back-up pool of providers. traveler nurses, per diems, extra shifts for COVID ICU, burnout, morale, or any other areas you saw changes at your institution.</li> <li>4) Daily rounding.</li> <li>5) Meetings/administrative activities.</li> <li>6) Any other areas that you would like to cover.</li> </ol> |



would\_you\_like\_to\_share\_wi

Any other information that you would like to share with us that would be relevant to publish regarding NCC delivery in the pandemic?

Describe any positive takeaways from the pandemic regarding neurocritical care delivery.
