# Supplementary material
Source: PubMed Central journal article supplement (PMC8900891)
Supplement: ana-34-209-s003.pdf [file ana-34-209-s003.pdf]

### Supplementary Digital Content 3

### Surges in SARS-COV-2 Deaths between 2020-2021 by Country Income Level

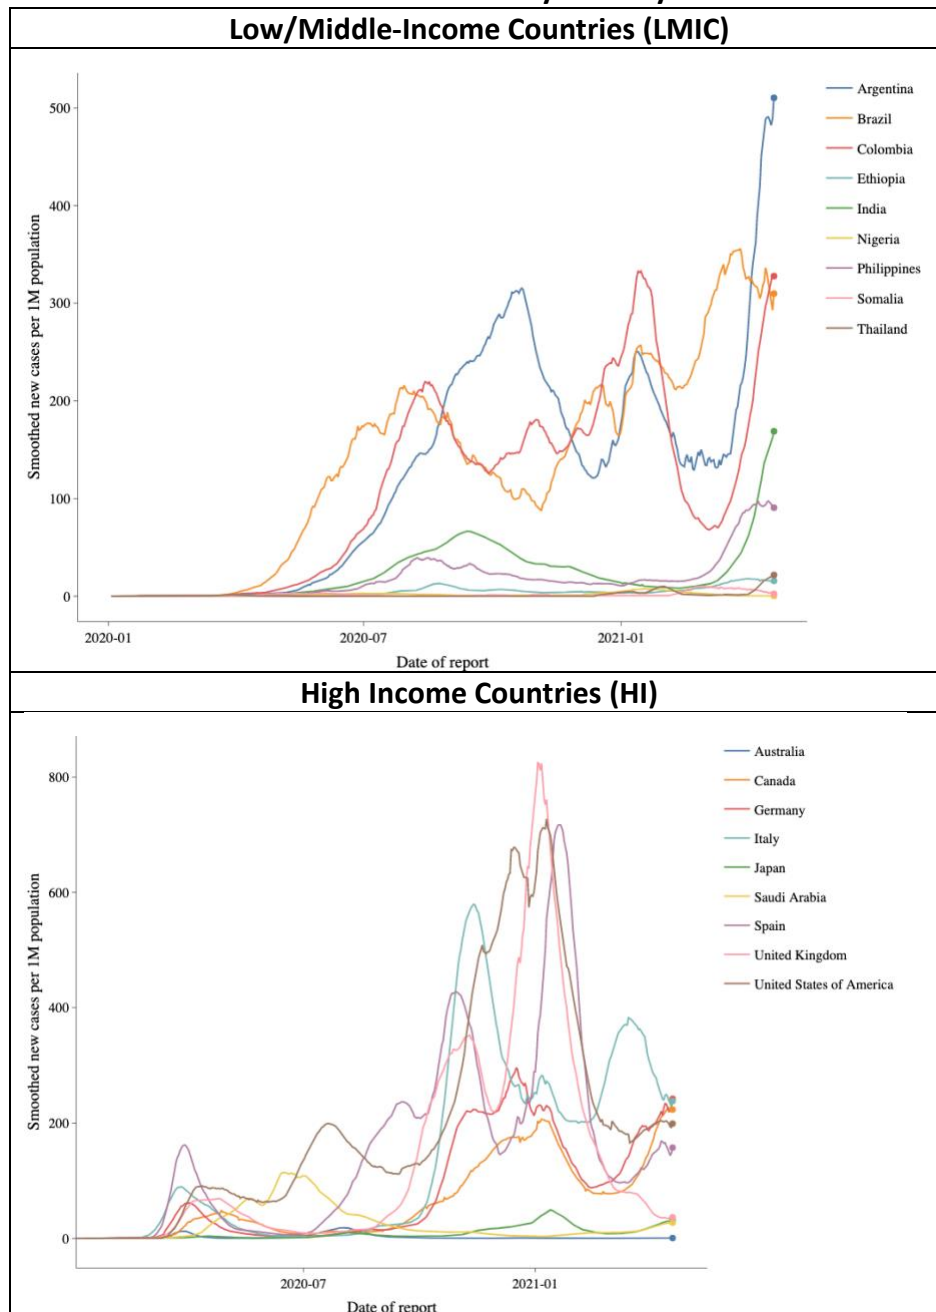

Date of Report: 04/20/2021

#### Notes:

- 1) This is a representative figure from the World Health Organization ([WHO COVID-19 Explorer \(shinyapps.io\)](https://www.who.int/emergencies/diseases/novel-coronavirus-2019/situation-reports))
- 2) Y-axis: deaths/1 million population scale is higher in LMIC compared to HI
- 3) The first surge in HI in April 2020, while that LMIC was in July 2020
