# Supplementary material
Source: PubMed Central journal article supplement (PMC8900891)

### Supplementary Digital Content 4

## Impact of the SARS-CoV-2 Pandemic on Specific Drug Shortages by Country Income Level, Geographically Dedicated Neurocritical Care Unit, and by Surge of COVID-19 Patients

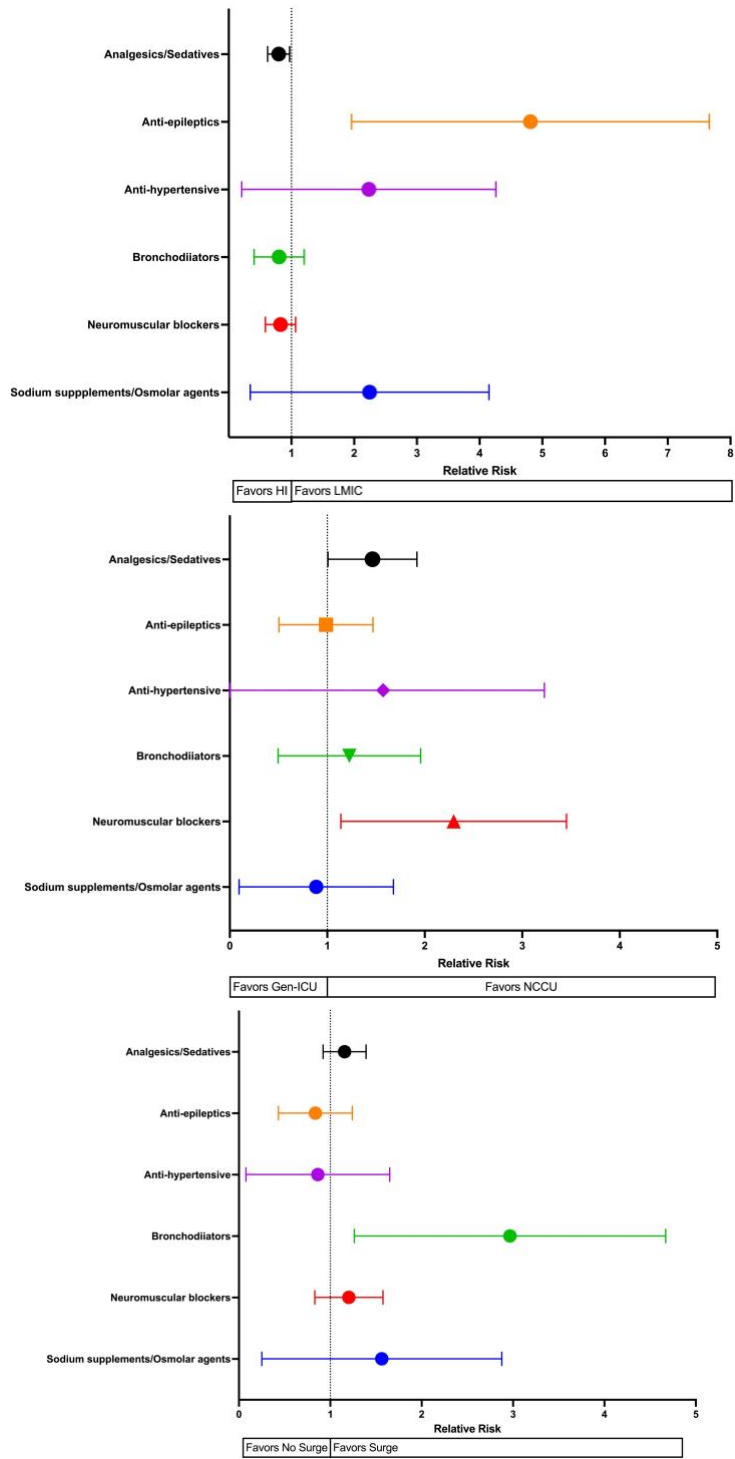

Supplement: ana-34-209-s004.pdf [file ana-34-209-s004.pdf]
