# Supplementary material
Source: PubMed Central journal article supplement (PMC8900891)

## Supplementary Digital Content 5:

### Reduction in Diagnostic Testing During the COVID-19 Pandemic by Country Income Level, Geographically Dedicated Neurocritical Care Unit, and by Surge of COVID-19 Patients

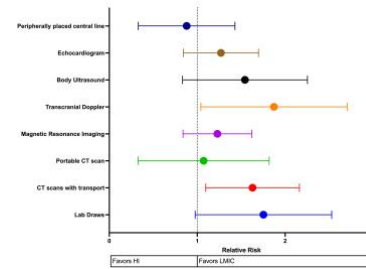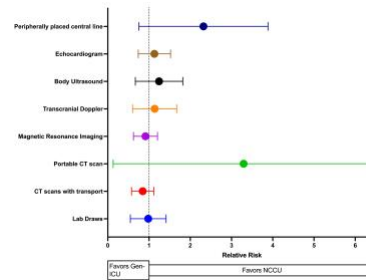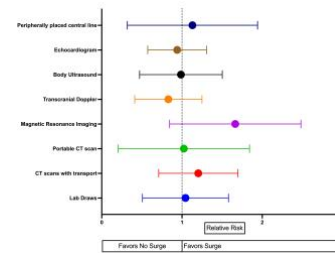

Supplement: ana-34-209-s005.pdf [file ana-34-209-s005.pdf]
